# Supplementary material for: Antioxidant Properties of Chokeberry Products—Assessment of the Composition of Juices and Fibers
Source: MDPI journal article supplement (doi:10.3390/foods12214029), 2023-11-05
Supplement: s1 [file s1]

# Antioxidant Properties of Chokeberry Products - Assessment of the Composition of Juices and Fibers

Ewa Olechno <sup>1</sup>, Anna Puścion-Jakubik <sup>2,\*</sup>, Jolanta Soroczyńska <sup>2</sup>, Katarzyna Socha <sup>2</sup>, Monika Cyuńczyk <sup>1</sup>, Małgorzata Elżbieta Zujko <sup>1,\*</sup>

<sup>1</sup> Department of Food Biotechnology, Faculty of Health Science, Medical University of Białystok, Szpitalna 37 Street, 15-295 Białystok, Poland; ewa.olechno@sd.umb.edu.pl (E.O.); monika.cyunczyk@umb.edu.pl (M.C.); malgorzata.zujko@umb.edu.pl (M.E.Z.)

<sup>2</sup> Department of Bromatology, Faculty of Pharmacy with the Division of Laboratory Medicine, Medical University of Białystok, Mickiewicza 2D Street, 15-222 Białystok, Poland; anna.puscion-jakubik@umb.edu.pl (A.P.J.); jolanta.soroczynska@umb.edu.pl (J.S.); katarzyna.socha@umb.edu.pl (K.S.)

\* Correspondence: anna.puscion-jakubik@umb.edu.pl, malgorzata.zujko@umb.edu.pl

**Table S1.** Content of Studied Antioxidants Parameters in Other Studies.

| Studied Component                                                    | Type Of Product          | Content of Studied Antioxidant Parameters                                                                           |
|----------------------------------------------------------------------|--------------------------|---------------------------------------------------------------------------------------------------------------------|
| Total Anthocyanins in Chokeberry Products (mg Cy-3-GL/kg of Product) | Chokeberry Juice         | 1209.7 [6], 150-1228 [40], 400-700 [46], 150 (Commercial Chokeberry Juice) [55], 2180 (Fresh Chokeberry Juice) [55] |
|                                                                      | Chokeberry Fruits        | 6936 [43], 6784-7415 [44], 13087.5-14552.5 [57], 4500 [46]                                                          |
|                                                                      | Chokeberry Dried Fruits  | 1954-2466 [40] 1400-3100 [46]                                                                                       |
|                                                                      | Chokeberryy Concentrate  | 3600 [46]                                                                                                           |
|                                                                      | Chokeberry Pomace        | 10000 [46]                                                                                                          |
|                                                                      | Chokeberry Jam           | 200-400 [46]                                                                                                        |
|                                                                      | Chokeberry Compote       | 200 [46]                                                                                                            |
|                                                                      | Chokeberry Syrup         | 100 [46]                                                                                                            |
|                                                                      | Chokeberry Powder        | 1165-1641 [40]                                                                                                      |
|                                                                      | Chokeberry Fruit Tea     | 282-675 [40]                                                                                                        |
| Total Anthocyanins in Other Products (mg Cy-3-GL/kg of Product)      | Acerola Juice            | 55.7 [48]                                                                                                           |
|                                                                      | Cranberry Juice          | 200.4 [48]                                                                                                          |
|                                                                      | Elderberry Juice         | 1966.8 [6]                                                                                                          |
|                                                                      | Gojiiberry Juice         | 44.5 [48]                                                                                                           |
|                                                                      | Japanese Quince Juice    | 77.9 [48]                                                                                                           |
|                                                                      | Sea Buckthorn Juice      | 22.3 [48]                                                                                                           |
|                                                                      | Wild Rose Juice          | 0.3 [6], 27.8 [48]                                                                                                  |
|                                                                      | Bilberry Fruits          | 6555 [43]                                                                                                           |
|                                                                      | Black Elder Fruits       | 7183 [43]                                                                                                           |
|                                                                      | Raspberry Fruits         | 598 [43]                                                                                                            |
| Total Flavonoids in Chokeberry Products (mg CE or QE/kg of Product)  | Chokeberry Juice         | 2700-2900 <sup>a</sup> [46], 5069 <sup>a</sup> [6]                                                                  |
|                                                                      | Chokeberry Fruits        | 5300 <sup>a</sup> [46]                                                                                              |
|                                                                      | Chokeberry Powder        | 34.5-52.2 <sup>b</sup> [54]                                                                                         |
|                                                                      | Chokeberry Dried Berries | 12500-19900 <sup>a</sup> [46]                                                                                       |
|                                                                      | Chokebery Concentrate    | 6100 <sup>a</sup> [46]                                                                                              |
|                                                                      | Chokeberry Pomace        | 9300 <sup>a</sup> [46]                                                                                              |
|                                                                      | Chokeberry Jam           | 2900-6400 <sup>a</sup> [46]                                                                                         |
|                                                                      | Chokeberry Compote       | 3300 <sup>a</sup> [46]                                                                                              |

|                                                             |                          |                                                                                                                       |
|-------------------------------------------------------------|--------------------------|-----------------------------------------------------------------------------------------------------------------------|
| Total Flavonoids in Other Products<br>(mg QE/kg of Product) | Acerola Juice            | 1574 <sup>a</sup> [48]                                                                                                |
|                                                             | Cranberry Juice          | 24 <sup>a</sup> [6], 527 <sup>a</sup> [48]                                                                            |
|                                                             | Elderberry Juice         | 804 <sup>a</sup> [6]                                                                                                  |
|                                                             | Gojiberry Juice          | 139 <sup>a</sup> [48]                                                                                                 |
|                                                             | Japanese Quince Juice    | 3214 <sup>a</sup> [6], 2641 <sup>a</sup> [48]                                                                         |
|                                                             | Sea Buckthron Juice      | 3833 <sup>a</sup> [6], 251 <sup>a</sup> [48]                                                                          |
|                                                             | Wild Rose Juice          | 5607 <sup>a</sup> [6], 5864 <sup>a</sup> [48]                                                                         |
|                                                             |                          |                                                                                                                       |
| FRAP in Chokeberry Products<br>(mmol/kg)                    | Chokeberry Juice         | 7.79-10.41 <sup>d</sup> [13], 38.71-79.86 <sup>c</sup> [40], 134.61 <sup>c</sup> [41], 44.9 <sup>e</sup> [42]         |
|                                                             | Dried Chokeberry Fruits  | 183.52-191.31 <sup>c</sup> [40]                                                                                       |
|                                                             | Chokeberry Powder        | 47.38-68.6 <sup>c</sup> [40]                                                                                          |
|                                                             | Chokeberry Fruit Tea     | 111.43-163.33 <sup>c</sup> [40]                                                                                       |
| FRAP in Other Products (mmol/kg)                            | Acerola Juice            | 63.2 <sup>e</sup> [42]                                                                                                |
|                                                             | Blackcurrant Juice       | 36.5 <sup>e</sup> [42]<br>108 <sup>c</sup> [49]                                                                       |
|                                                             | Black Elder Juice        | 35.5 <sup>e</sup> [42]                                                                                                |
|                                                             | Cranberry Juice          | 7.5 <sup>e</sup> [42]                                                                                                 |
|                                                             | Pomegranate Juice        | 28.7 <sup>e</sup> [42]                                                                                                |
|                                                             | Sea Buckthorn Juice      | 11.6 <sup>e</sup> [42]                                                                                                |
|                                                             |                          |                                                                                                                       |
| TPC in Chokeberry Products<br>(mg GAE/kg)                   | Chokeberry Juice         | 11,266 [6], 3002-6639 [40], 8297 [42], 6300-6600 [46], 5138-8988.3 [45], 5561-7956 [53], 5860 -5930 [55], 6884.7 [57] |
|                                                             | Chokeberry Nectar        | 2475.2-3782.1 [45]                                                                                                    |
|                                                             | Chokeberry Fresh Berries | 19,500-23,400 [47], 13,300 [46]                                                                                       |
|                                                             | Chokeberry Dried Berries | 1954-2466 [40], 40152.5 [57] 39,900-50,100 [46]                                                                       |
|                                                             | Chokebery Concentrate    | 29,600 [46]                                                                                                           |
|                                                             | Chokeberry Pomace        | 9300 [46]                                                                                                             |
|                                                             | Chokeberry Jam           | 6900-12000 [46]                                                                                                       |
|                                                             | Chokeberry Compote       | 6700 [46]                                                                                                             |
|                                                             | Chokeberry Syrup         | 2600 [46]                                                                                                             |
|                                                             | Chokeberry Tea           | 1494-3436 [40]                                                                                                        |
|                                                             | Chokeberry Powder        | 276.3-326.1 [54], 4233-4434 [40]                                                                                      |
|                                                             | Acerola Juice            | 13707 [48], 7362 [42]                                                                                                 |

|                                                |                          |                                           |
|------------------------------------------------|--------------------------|-------------------------------------------|
| TPC in Other Products<br>(mg GAE/kg)           | Apple Juice              | 571 [50], 1142.12 [51]                    |
|                                                | Black Elder Juice        | 5881 [42]                                 |
|                                                | Billberry Juice          | 3845.04 [51]                              |
|                                                | Blackcurrant Juice       | 1088.8-1392.2 [52], 5402 [42]             |
|                                                | Carrot Juice             | 338.9 [52]                                |
|                                                | Cranberry Juice          | 2773 [6], 1627 [53], 3504 [48], 1547 [42] |
|                                                | Gojiiberry Juice         | 4028 [48]                                 |
|                                                | Grape Juice              | 1674.79 [51], 643.4-1564 [52]             |
|                                                | Grapefruit juice         | 496.8-537.6 [52]                          |
|                                                | Japanese Quince          | 6852 [48]                                 |
|                                                | Orange Juice             | 840.59 [51], 385.1-541.6 [52], 195 [50]   |
|                                                | Pineapple juice          | 369.6-1018.6 [52]                         |
|                                                | Pomegranate Juice        | 3558 [53], 3717 [42]                      |
|                                                | Sea Buckthorn Juice      | 4784 [48], 2408 [42]                      |
|                                                | Sour CherryJuice         | 2447.25 [51]                              |
|                                                | Strawberry Juice         | 1406.12 [51]                              |
|                                                | Tomato Juice             | 213.6-358.1 [52], 184 [50]                |
|                                                | Wild Rose Juice          | 16,619 [6], 13188 [48]                    |
|                                                | Elderberry Juice         | 6826 [6], 3239 [53]                       |
|                                                | Chokeberry Juice         | 398 [42], 987.5 [53]                      |
| Vitamin C in Chokeberry Products<br>(mg AA/kg) | Chokeberry Fruits        | 130 [42], 318.5 [53]                      |
|                                                | Chokeberry Dried Berries | 151.1 [53]                                |
|                                                | Chokeberry Jam           | 79.6 [53]                                 |
| Vitamin C in Other Products<br>(mg AA/kg)      | Acerola Juice            | 9283 [48], 8528 [42]                      |
|                                                | Apple Juice              | 372 [50]                                  |
|                                                | Apple, Puree             | 149-435 [50]                              |
|                                                | Bilberry Fruits          | 183 [43]                                  |
|                                                | Blackcurrant Juice       | 801 [42]                                  |
|                                                | Black Elder Juice        | 295 [42]                                  |
|                                                | Black Elder Fruits       | 171 [43]                                  |
|                                                | Cranberry Juice          | 250 [48], 1145 [42]                       |
|                                                | Gojiiberry Juice         | 4237 [48]                                 |
|                                                | Grape Juice              | 380.16-454.57 [58]                        |

|                       |                              |
|-----------------------|------------------------------|
| Japanese Quince Juice | 1978 [48]                    |
| Orange Juice          | 346 [50], 550.87-612.15 [58] |
| Pomegranate Juice     | 5 [42]                       |
| Raspberry Fruits      | 200 [43]                     |
| Sea Buckthorn Juice   | 3255 [48], 1175 [42]         |
| Tomato Juice          | 32 [50]                      |
| Wild Rose Juice       | 4548 [48]                    |

AA - ascorbic acid, Cy-3-GL - cyanidin-3-glucoside, FRAP - Ferric Reducing Antioxidant Power Assay, GAE - gallic acid, QE- quercetin, <sup>a</sup> - mg catechin/kg of product, <sup>b</sup> - mg quercetin/kg of product, <sup>c</sup> – FRAP value in mmol/kg of product, <sup>d</sup> – FRAP value in mg of Trolox equivalents/mL of product, <sup>e</sup> - FRAP value in mM of Trolox equivalents
